# Supplementary material for: Symmetry breaking of A3M2X9-type perovskite derivatives induced by polar quaternary ammonium cations: achieving efficient nonlinear optical properties
Source: Royal Society of Chemistry journal article supplement (doi:10.1039/d2dt00451h), 2022-01-01
Supplement: d2dt00451h1.pdf [file d2dt00451h1.pdf]

## Supporting Information

### **Symmetry Breaking of $A_3M_2X_9$ -type Perovskites-Derivative Induced by Polar Quaternary Ammonium Cation: Achieving Efficient Nonlinear Optical Properties**

**Jiajing Wu\*, Yue Guo, Wen-Dong Yao, Wenlong Liu and Sheng-Ping Guo\***

School of Chemistry and Chemical Engineering, Yangzhou University, Yangzhou, Jiangsu 225002, P.  
R. China.

E-mail: spguo@yzu.edu.cn, jiajingw@yzu.edu.cn

# Contents

## Experimental Section

**Table S1.** Fractional atomic coordinates ( $\times 10^4$ ) and equivalent isotropic displacement Parameters ( $\text{\AA}^2 \times 10^3$ ) for  $(\text{BTA})_3\text{Bi}_2\text{Cl}_9$ .

**Table S2.** Bond lengths for  $(\text{BTA})_3\text{Bi}_2\text{Cl}_9$

**Table S3.** Bond angles for  $(\text{BTA})_3\text{Bi}_2\text{Cl}_9$ .

**Table S4.** Hydrogen bond lengths ( $\text{\AA}$ ) for  $(\text{BTA})_3\text{Bi}_2\text{Cl}_9$ .

**Table S5.** Infrared vibrations ( $\text{cm}^{-1}$ ) of  $(\text{BTA})_3\text{Bi}_2\text{Cl}_9$ .

**Table S6.** Comparison of structural features and NLO properties for low-toxic lead-free hybrid metal halides.

**Table S7.** The x/y/z-projections of local dipole moment (D) of  $[\text{BiCl}_6]^{3-}$  octahedrons and  $\text{BTA}^+$  groups in one-unit cell of  $(\text{BTA})_3\text{Bi}_2\text{Cl}_9$ .

**Figure S1.** The crystal structures of  $(\text{CH}_3\text{NH}_3)_3\text{Bi}_2\text{Cl}_9$  and  $(\text{CH}_3)_4\text{N})_3\text{Bi}_2\text{Cl}_9$ .

**Figure S2.** The powder X-ray diffraction patterns of  $(\text{BTA})_3\text{Bi}_2\text{Cl}_9$ , including simulated and experimental ones (Blue: after exposed in air for 40 days and dried at  $120\text{ }^\circ\text{C}$ ).

**Figure S3.** Structure showing the hydrogen bonds between the hydrogen atoms in  $\text{BTA}^+$  cations and the chlorine atoms in  $[\text{Bi}_2\text{Cl}_9]^{3-}$ .

**Figure S4.** Uniformly arranged organic cations viewed along the *b*-axis.

**Figure S5.** Dipole moments of  $[\text{Bi}_2\text{Cl}_9]^{3-}$  and  $\text{BTA}^+$  groups in one-unit cell.

**Figure S6.** Partial density of states of C, N, and H atoms in  $(\text{BTA})_3\text{Bi}_2\text{Cl}_9$ .

**Figure S7.** The calculated real and imaginary parts of the dielectric function polarized along three directions for  $(\text{BTA})_3\text{Bi}_2\text{Cl}_9$ .

**Table S1.** Fractional atomic coordinates ( $\times 10^4$ ) and equivalent isotropic displacement parameters ( $\text{\AA}^2 \times 10^3$ ) for  $(\text{BTA})_3\text{Bi}_2\text{Cl}_9$ .

| Atom   | <i>x</i>    | <i>y</i>   | <i>z</i>    | $U_{\text{eq}}$ |
|--------|-------------|------------|-------------|-----------------|
| Bi (1) | 8325.2(2)   | 5772.0(2)  | 10057.2(2)  | 39.5 (7)        |
| Bi (2) | 5678.1(2)   | 6591.7(2)  | 9977.9(2)   | 38.8 (7)        |
| Cl (1) | 10105.3(15) | 6232.7(9)  | 10474.2(12) | 60.3(5)         |
| Cl (2) | 8741(2)     | 4880.6(10) | 10896.4(16) | 86.3(8)         |
| Cl (3) | 9027.2(18)  | 5308.9(10) | 8829.8(13)  | 69.6(6)         |
| Cl (4) | 7199.2(15)  | 6390.8(8)  | 11242.0(10) | 50.6(5)         |
| Cl (5) | 6227.5(15)  | 5371.1(8)  | 9693.1(10)  | 50.7(4)         |
| Cl (6) | 4072.1(16)  | 6266.3(9)  | 10724.6(12) | 64.0(5)         |
| Cl (7) | 4578.1(17)  | 6763.1(10) | 8708.0(11)  | 63.5(5)         |
| Cl (8) | 5548.9(16)  | 7660.9(8)  | 10395.3(12) | 55.9(5)         |
| Cl (9) | 7558.6(16)  | 6803.2(9)  | 9167.7(11)  | 56.3(5)         |
| N (1)  | 5562(4)     | 5408(2)    | 7126(3)     | 39.3(1)         |
| C (14) | 3541(7)     | 6125(4)    | 6215(5)     | 65(2)           |
| C (15) | 2963(8)     | 6626(5)    | 6078(6)     | 81(3)           |
| C (16) | 3429(10)    | 7138(5)    | 5943(6)     | 86(3)           |
| C (17) | 4482(10)    | 7168(4)    | 5925(6)     | 85(3)           |
| C (18) | 5086(7)     | 6674(4)    | 6079(5)     | 62(2)           |
| C (19) | 4616(6)     | 6142(3)    | 6222(4)     | 47.5(2)         |
| C (20) | 5248(6)     | 5590(3)    | 6300(4)     | 47.3(2)         |
| C (21) | 6212(6)     | 5883(3)    | 7542(4)     | 46.2(2)         |
| C (22) | 7247(6)     | 6020(4)    | 7198(5)     | 62(2)           |
| C (23) | 6176(7)     | 4846(3)    | 7048(4)     | 55(2)           |
| C (24) | 6565(8)     | 4579(4)    | 7812(5)     | 69(3)           |
| C (25) | 4640(6)     | 5322(3)    | 7615(4)     | 50.2(2)         |
| C (26) | 3927(9)     | 4819(4)    | 7353(6)     | 84(3)           |
| N (2)  | 846(4)      | 7076(3)    | 8174(3)     | 43.7(1)         |
| C (27) | 2120(7)     | 7485(4)    | 9886(4)     | 60(2)           |
| C (28) | 2814(7)     | 7842(5)    | 10267(5)    | 73(3)           |
| C (29) | 2787(8)     | 8427(5)    | 10126(6)    | 81(3)           |
| C (30) | 2058(9)     | 8666(4)    | 9626(5)     | 77(3)           |
| C (31) | 1334(8)     | 8302(4)    | 9251(5)     | 65(2)           |
| C (32) | 1352(6)     | 7699(3)    | 9372(4)     | 47.1(2)         |
| C (33) | 567(6)      | 7299(3)    | 8979(4)     | 49.1(2)         |
| C (34) | 963(6)      | 7570(4)    | 7610(4)     | 50.1(2)         |
| C (35) | -5(8)       | 7916(4)    | 7427(5)     | 79(3)           |
| C (36) | -19(6)      | 6665(4)    | 7917(5)     | 64(2)           |

**Table S1.** Fractional atomic coordinates ( $\times 10^4$ ) and equivalent isotropic displacement parameters ( $\text{\AA}^2 \times 10^3$ ) for  $(\text{BTA})_3\text{Bi}_2\text{Cl}_9$ .

| Atom   | $x$      | $y$     | $z$     | $U_{\text{eq}}$ |
|--------|----------|---------|---------|-----------------|
| C (37) | 107(7)   | 6375(4) | 7130(5) | 75(3)           |
| C (38) | 1881(6)  | 6757(3) | 8228(5) | 53.7(19)        |
| C (39) | 1908(7)  | 6194(4) | 8678(5) | 75(3)           |
| N (3)  | 750(6)   | 3590(3) | 7937(5) | 71.4(18)        |
| C (1)  | 2166(13) | 4900(6) | 9817(8) | 125(4)          |
| C (2)  | 3136(12) | 4840(6) | 9647(7) | 113(4)          |
| C (3)  | 3563(12) | 4363(7) | 9337(7) | 120(4)          |
| C (4)  | 2898(10) | 3924(6) | 9055(6) | 101(3)          |
| C (5)  | 1851(8)  | 3981(4) | 9112(5) | 72(2)           |
| C (6)  | 1455(11) | 4423(6) | 9526(7) | 114(3)          |
| C (7)  | 1154(9)  | 3505(4) | 8768(6) | 83(3)           |
| C (8)  | 1602(9)  | 3519(5) | 7364(7) | 103(3)          |
| C (9)  | 1983(10) | 2843(6) | 7326(8) | 129(5)          |
| C (10) | -105(9)  | 3145(5) | 7707(7) | 105(3)          |
| C (11) | -1115(9) | 3245(6) | 8120(8) | 122(4)          |
| C (12) | 216(11)  | 4186(5) | 7746(9) | 120(4)          |
| C (13) | 967(12)  | 4653(6) | 7471(8) | 138(5)          |

$U_{\text{eq}}$  is defined as 1/3 of the trace of the orthogonalised  $U_{ij}$  tensor.

**Table S2.** Bond lengths for (BTA)<sub>3</sub>Bi<sub>2</sub>Cl<sub>9</sub>.

| Atom   | Atom   | Length/Å  | Atom   | Atom   | Length/Å  |
|--------|--------|-----------|--------|--------|-----------|
| Bi (1) | Cl (1) | 2.596(2)  | N (2)  | C (34) | 1.501(9)  |
| Bi (1) | Cl (2) | 2.541(2)  | N (2)  | C (36) | 1.509(9)  |
| Bi (1) | Cl (3) | 2.561(2)  | N (2)  | C (38) | 1.520(9)  |
| Bi (1) | Cl (4) | 2.918(2)  | C (27) | C (28) | 1.358(12) |
| Bi (1) | Cl (5) | 2.896 (2) | C (27) | C (32) | 1.385(10) |
| Bi (1) | Cl (9) | 2.957(2)  | C (28) | C (29) | 1.362(13) |
| Bi (2) | Cl (4) | 2.895(2)  | C (29) | C (30) | 1.359(13) |
| Bi (2) | Cl (5) | 2.929(2)  | C (30) | C (31) | 1.387(13) |
| Bi (2) | Cl (6) | 2.592(2)  | C (31) | C (32) | 1.397(11) |
| Bi (2) | Cl (7) | 2.577(2)  | C (32) | C (33) | 1.502(10) |
| Bi (2) | Cl (8) | 2.557(2)  | C (34) | C (35) | 1.500(12) |
| Bi (2) | Cl (9) | 2.889(2)  | C (36) | C (37) | 1.521(12) |
| N (1)  | C (20) | 1.516(8)  | C (38) | C (39) | 1.502(11) |
| N (1)  | C (21) | 1.529(9)  | N (3)  | C (7)  | 1.510(12) |
| N (1)  | C (23) | 1.520(9)  | N (3)  | C (8)  | 1.515(13) |
| N (1)  | C (25) | 1.499(9)  | N (3)  | C (10) | 1.537(13) |
| C (14) | C (15) | 1.382(12) | N (3)  | C (12) | 1.557(14) |
| C (14) | C (19) | 1.384(11) | C (1)  | C (2)  | 1.303(18) |
| C (15) | C (16) | 1.342(14) | C (1)  | C (6)  | 1.496(18) |
| C (16) | C (17) | 1.360(15) | C (2)  | C (3)  | 1.343(17) |
| C (17) | C (18) | 1.390(12) | C (3)  | C (4)  | 1.393(17) |
| C (18) | C (19) | 1.387(11) | C (4)  | C (5)  | 1.363(14) |
| C (19) | C (20) | 1.507(10) | C (5)  | C (6)  | 1.350(15) |
| C (21) | C (22) | 1.517(11) | C (5)  | C (7)  | 1.516(13) |
| C (23) | C (24) | 1.512(10) | C (8)  | C (9)  | 1.625(15) |
| C (25) | C (26) | 1.529(11) | C (10) | C (11) | 1.527(15) |
| N (2)  | C (33) | 1.532(9)  | C (12) | C (13) | 1.529(17) |

**Table S3.** Bond angles for (BTA)<sub>3</sub>Bi<sub>2</sub>Cl<sub>9</sub>.

| Atom Atom Atom       | Angle/°   | Atom Atom Atom       | Angle/°   |
|----------------------|-----------|----------------------|-----------|
| Cl (1) Bi (1) Cl (4) | 94.10(6)  | C (14) C (19) C (18) | 117.9(7)  |
| Cl (1) Bi(1) Cl (5)  | 173.14(6) | C (14) C (19) C (20) | 120.9(8)  |
| Cl (1) Bi (1) Cl (9) | 95.10(6)  | C (18) C (19) C (20) | 120.9(7)  |
| Cl (2) Bi (1) Cl (1) | 90.49(8)  | C (19) C (20) N (1)  | 115.7(6)  |
| Cl (2) Bi (1) Cl (3) | 93.51(8)  | C (22) C (21) N (1)  | 115.9(6)  |
| Cl (2) Bi (1) Cl (4) | 95.33(8)  | C (24) C (23) N (1)  | 114.7(6)  |
| Cl (2) Bi (1) Cl (5) | 92.23(7)  | N (1) C (25) C (26)  | 114.5(6)  |
| Cl (2) Bi (1) Cl (9) | 172.24(7) | C (34) N (2) C (33)  | 111.4(6)  |
| Cl (3) Bi (1) Cl (1) | 93.14(7)  | C (34) N (2) C (36)  | 112.1(6)  |
| Cl (3) Bi (1) Cl (4) | 168.52(7) | C (34) N (2) C (38)  | 106.7(5)  |
| Cl (3) Bi (1) Cl (5) | 92.98(7)  | C (36) N (2) C (33)  | 105.7(5)  |
| Cl (3) Bi (1) Cl (9) | 91.56(7)  | C (36) N (2) C (38)  | 110.7(6)  |
| Cl (4) Bi (1) Cl (9) | 78.93(5)  | C (38) N (2) C (33)  | 110.2(5)  |
| Cl (5) Bi (1) Cl (4) | 79.39(5)  | C (28) C (27) C (32) | 122.0(8)  |
| Cl (5) Bi (1) Cl (9) | 81.63(5)  | C (27) C (28) C (29) | 119.7(9)  |
| Cl (4) Bi (2) Cl (5) | 79.23(5)  | C (30) C (29) C (28) | 121.3(9)  |
| Cl (6) Bi (2) Cl (4) | 96.43(6)  | C (29) C (30) C (31) | 118.9(9)  |
| Cl (6) Bi (2) Cl (5) | 90.74(6)  | C (30) C (31) C (32) | 121.2(8)  |
| Cl (6) Bi (2) Cl (9) | 172.72(7) | C (27) C (32) C (31) | 116.8(8)  |
| Cl (7) Bi (2) Cl (4) | 170.65(6) | C (27) C (32) C (33) | 121.2(7)  |
| Cl (7) Bi (2) Cl (5) | 97.57(6)  | C (31) C (32) C (33) | 121.9(7)  |
| Cl (7) Bi (2) Cl (6) | 92.38(7)  | C (32) C (33) N (2)  | 115.4(6)  |
| Cl (7) Bi (2) Cl (9) | 90.47(7)  | C (35) C (34) N (2)  | 115.2(7)  |
| Cl (8) Bi (2) Cl (4) | 89.55(6)  | N (2) C (36) C (37)  | 115.1(7)  |
| Cl (8) Bi (2) Cl (5) | 168.20(6) | C (39) C (38) N (2)  | 116.3(6)  |
| Cl (8) Bi (2) Cl (6) | 94.17(7)  | C (7) N (3) C (8)    | 111.8(8)  |
| Cl (8) Bi (2) Cl (7) | 92.94(7)  | C (7) N (3) C (10)   | 111.7(8)  |
| Cl (8) Bi (2) Cl (9) | 92.37(6)  | C (7) N (3) C (12)   | 116.2(9)  |
| Cl (9) Bi (2) Cl (4) | 80.42(5)  | C (8) N (3) C (10)   | 107.1(8)  |
| Cl (9) Bi (2) Cl (5) | 82.24(6)  | C (8) N (3) C (12)   | 106.5(8)  |
| Bi (2) Cl (4) Bi (1) | 83.99(5)  | C (10) N (3) C (12)  | 102.8(9)  |
| Bi (1) Cl (5) Bi (2) | 83.80(5)  | C (2) C (1) C (6)    | 115.4(14) |
| Bi (2) Cl (9) Bi (1) | 83.42(5)  | C (1) C (2) C (3)    | 126.0(16) |
| C (20) N (1) C (21)  | 111.1(5)  | C (2) C (3) C (4)    | 117.8(15) |
| C (20) N (1) C (23)  | 105.5(5)  | C (5) C (4) C (3)    | 120.1(13) |
| C (23) N (1) C (21)  | 111.5(6)  | C (4) C (5) C (7)    | 118.4(10) |
| C (25) N (1) C (20)  | 112.0(6)  | C (6) C (5) C (4)    | 120.5(12) |

**Table S3.** Bond angles for (BTA)<sub>3</sub>Bi<sub>2</sub>Cl<sub>9</sub>.

| Atom Atom Atom       | Angle/°   | Atom Atom Atom      | Angle/°   |
|----------------------|-----------|---------------------|-----------|
| C (25) N (1) C (21)  | 105.2(5)  | C (6) C (5) C (7)   | 120.8(11) |
| C (25) N (1) C (23)  | 111.5(6)  | C (5) C (6) C (1)   | 118.8(13) |
| C (15) C (14) C (19) | 120.6(9)  | N (3) C (7) C (5)   | 116.6(8)  |
| C (16) C (15) C (14) | 120.8(10) | N (3) C (8) C (9)   | 110.9(9)  |
| C (15) C (16) C (17) | 120.2(9)  | C (11) C (10) N (3) | 113.4(10) |
| C (16) C (17) C (18) | 120.3(10) | C (13) C (12) N (3) | 113.4(11) |
| C (19) C (18) C (17) | 120.1(9)  |                     |           |

**Table S4.** Hydrogen bond lengths (Å) for (BTA)<sub>3</sub>Bi<sub>2</sub>Cl<sub>9</sub>.

| D–H          | d(D–H) | d(H...A) | d(D...A) | ∠(D–H...A)(°) | A                    |
|--------------|--------|----------|----------|---------------|----------------------|
| C(7)-H(7B)   | 0.970  | 2.896    | 3.513    | 122.46        | Cl (8) <sup>#1</sup> |
| C(8)-H(8B)   | 0.970  | 2.809    | 3.744    | 162.12        | Cl (1) <sup>#2</sup> |
| C(10)-H(10B) | 0.970  | 2.843    | 3.633    | 139.18        | Cl(7) <sup>#1</sup>  |
| C(12)-H(12B) | 0.970  | 2.744    | 3.560    | 142.15        | Cl(3) <sup>#3</sup>  |
| C(21)-H(21A) | 0.970  | 2.865    | 3.588    | 132.14        | C(17)                |
| C(21)-H(21B) | 0.970  | 2.922    | 3.874    | 167.19        | Cl (5)               |
| C(22)-H(22B) | 0.960  | 2.987    | 3.652    | 127.56        | Cl(2) <sup>#4</sup>  |
| C(24)-H(24A) | 0.960  | 2.925    | 3.615    | 129.68        | Cl(4) <sup>#4</sup>  |
| C(24)-H(24C) | 0.960  | 2.988    | 3.926    | 165.88        | Cl (3)               |
| C(33)-H(33B) | 0.970  | 2.659    | 3.610    | 166.93        | Cl(1) <sup>#3</sup>  |
| C(35)-H(35A) | 0.960  | 2.906    | 3.627    | 132.74        | Cl(6) <sup>#5</sup>  |
| C(36)-H(36B) | 0.970  | 2.837    | 3.710    | 150.27        | Cl(3) <sup>#3</sup>  |
| C(37)-H(37A) | 0.960  | 2.867    | 3.770    | 157.17        | Cl(8) <sup>#5</sup>  |
| C(38)-H(38B) | 0.970  | 2.883    | 3.535    | 125.46        | Cl (7)               |

Symmetry transformations used to generate equivalent atoms: #1  $x-1/2, y-1/2, z$ ; #2  $x-1, -y+1, z-1/2$ ; #3  $x-1, y, z$ ; #4  $x, -y+1, z-1/2$ ; #5  $x-1/2, -y+3/2, z-1/2$ .

**Table S5.** Infrared vibration peaks (cm<sup>-1</sup>) of (BTA)<sub>3</sub>Bi<sub>2</sub>Cl<sub>9</sub>.

| Wavenumber (cm <sup>-1</sup> ) | Assignment                                              |
|--------------------------------|---------------------------------------------------------|
| 3057                           | $\nu(\text{CH})$                                        |
| 2991                           | $\nu_{\text{as}}(\text{CH}_3)$                          |
| 2939                           | $\nu_{\text{as}}(\text{CH}_2)$                          |
| 1585                           | $\nu(\text{C}=\text{C}) + \delta(\text{CH})$            |
| 1470                           | $\delta_{\text{s}}(\text{CH}_3)$                        |
| 1384                           | $\omega(\text{CH}_2) + \delta_{\text{as}}(\text{CH}_3)$ |
| 1153                           | $\delta(\text{CH})$                                     |
| 1007                           | $\delta(\text{C-N-C}) + \nu(\text{C-C})$                |
| 796                            | $\nu_3(\text{NC}_4)$                                    |
| 753                            | $\gamma(\text{CH})$                                     |
| 705                            | $\nu(\text{CH}_2\text{-N})$                             |



**Table S6.** Comparison of structural feature and NLO properties for low-toxic lead-free hybrid metal halides.

| Materials                                                                                           | Space group                                           | Structural feature                                                            | Band gap (eV) | SHG response              | Ref. |
|-----------------------------------------------------------------------------------------------------|-------------------------------------------------------|-------------------------------------------------------------------------------|---------------|---------------------------|------|
| (PBA) <sub>4</sub> BiBr <sub>7</sub> ·H <sub>2</sub> O                                              | <i>C</i> 2                                            | 0D<br>[BiBr <sub>6</sub> ] <sup>3-</sup> octahedra                            | 3.52          | 0.4×KDP@1064<br>nm        | 1    |
| (PBA) <sub>4</sub> BiI <sub>7</sub> ·H <sub>2</sub> O                                               | <i>C</i> 2                                            | 0D<br>[BiI <sub>6</sub> ] <sup>3-</sup> octahedra                             | 2.29          | 2.3×AGS@2090<br>nm        | 2    |
| (PBA) <sub>4</sub> InBr <sub>7</sub> ·H <sub>2</sub> O                                              | <i>C</i> 2                                            | 0D<br>[InBr <sub>6</sub> ] <sup>3-</sup> octahedra                            | 4.05          | 0.6×KDP@1064<br>nm        | 2    |
| (C <sub>4</sub> H <sub>16</sub> N <sub>3</sub> )BiBr <sub>6</sub>                                   | <i>P</i> 2 <sub>1</sub> 2 <sub>1</sub> 2 <sub>1</sub> | 0D<br>[BiBr <sub>6</sub> ] <sup>3-</sup> octahedron                           | 2.72          | 0.6×KDP                   | 3    |
| [NH <sub>3</sub> CH <sub>2</sub> CH <sub>2</sub> F] <sub>3</sub> BiCl <sub>6</sub>                  | <i>P</i> 2 <sub>1</sub> 2 <sub>1</sub> 2              | 0D<br>[BiCl <sub>6</sub> ] <sup>3-</sup> octahedron                           | /             | PM;<br>0.6×KDP@1064<br>nm | 4    |
| [(C <sub>2</sub> H <sub>5</sub> ) <sub>4</sub> N]InCl <sub>4</sub>                                  | <i>P</i> 6 <sub>3</sub> mc                            | 0D<br>[InCl <sub>4</sub> ] <sup>-</sup> tetrahedron                           | 4.3           | PM;<br>0.5×KDP@1064<br>nm | 5    |
| [(C <sub>2</sub> H <sub>5</sub> ) <sub>4</sub> N]InCl <sub>2</sub> Br <sub>2</sub>                  | <i>P</i> 6 <sub>3</sub> mc                            | 0D<br>[InCl <sub>2</sub> Br <sub>2</sub> ] <sup>-</sup> tetrahedron           | 3.55          | PM;<br>0.7×KDP@1064<br>nm | 5    |
| [(C <sub>2</sub> H <sub>5</sub> ) <sub>4</sub> N]InBr <sub>4</sub>                                  | <i>P</i> 6 <sub>3</sub> mc                            | 0D<br>[InBr <sub>4</sub> ] <sup>-</sup> tetrahedron                           | 2.85          | PM;<br>0.8×KDP@1064<br>nm | 5    |
| (4-BrC <sub>6</sub> H <sub>4</sub> CH <sub>2</sub> NH <sub>3</sub> ) <sub>2</sub> MnBr <sub>4</sub> | <i>P</i> 2 <sub>1</sub> 2 <sub>1</sub> 2 <sub>1</sub> | 0D<br>[MnBr <sub>4</sub> ] <sup>2-</sup> tetrahedra                           | /             | PM;<br>0.3×KDP@1064<br>nm | 6    |
| [(R)-3-hydroxy-pyrrolidinium] <sub>5</sub> Sb <sub>4</sub> Br <sub>17</sub>                         | <i>P</i> 2 <sub>1</sub> 2 <sub>1</sub> 2 <sub>1</sub> | 0D<br>[Sb <sub>4</sub> Br <sub>16</sub> ] <sup>4+</sup> tetranuclear clusters | 3.0           | 0.79×KDP@1064<br>nm       | 6    |
| [C <sub>5</sub> H <sub>12</sub> N]SnCl <sub>3</sub>                                                 | <i>P</i> 2 <sub>1</sub> 2 <sub>1</sub> 2 <sub>1</sub> | 0D<br>[SnCl <sub>6</sub> ] <sup>2-</sup> octahedra                            | 3.647         | PM;<br>1.1×KDP@1064<br>nm | 7    |
| [NH <sub>2</sub> (CH <sub>2</sub> CH <sub>3</sub> ) <sub>2</sub> ] <sub>3</sub> BiCl <sub>6</sub>   | <i>R</i> 3c                                           | 0D<br>[BiCl <sub>6</sub> ] <sup>3-</sup> octahedron                           | 3.26          | PM; 1.9×<br>KDP@1064 nm   | 8    |

**Table S6.** Comparison of structural features and NLO properties for low-toxic lead-free hybrid metal halides.

| Materials                                                                               | Space group  | Structural feature                                                                                      | Band gap (eV) | SHG response                        | Ref.      |
|-----------------------------------------------------------------------------------------|--------------|---------------------------------------------------------------------------------------------------------|---------------|-------------------------------------|-----------|
| $[\text{NH}_2(\text{CH}_2\text{CH}_3)_2]_3\text{BiBr}_6$                                | $R3c$        | 0D<br>[BiBr <sub>6</sub> ] <sup>3-</sup> octahedron                                                     | 2.81          | PM;<br>3.2×KDP@1064 nm              | 8         |
| (R-MPEA) <sub>2</sub> SnBr <sub>6</sub>                                                 | $P2_1$       | 0D<br>[SnBr <sub>6</sub> ] <sup>2-</sup> octahedra                                                      | 2.68          | PM; 18×α-SiO <sub>2</sub> @980 nm   | 9         |
| [(R)-C <sub>8</sub> H <sub>12</sub> N <sub>4</sub> ][Bi <sub>2</sub> Br <sub>10</sub> ] | $P2_1$       | 0D<br>edge-sharing [Bi <sub>2</sub> Br <sub>10</sub> ] <sup>4-</sup> dimers.                            | 2.88          | NPM; 20×α-SiO <sub>2</sub> @1064 nm | 10        |
| (R-MBA)BiI <sub>4</sub>                                                                 | $P2_12_12_1$ | 1D<br>edge-sharing [BiI <sub>6</sub> ] <sup>3-</sup> octahedra                                          | /             | 1.56×LiNbO <sub>3</sub> @150 nm     | 11        |
| (R-MBA) <sub>2</sub> CuCl <sub>4</sub>                                                  | $C2$         | 2D<br>[CuCl <sub>4</sub> ] <sup>2-</sup> tetrahedra                                                     | 2.93          | 28.75 pmV <sup>-1</sup> @800 nm     | 12        |
| N(CH <sub>3</sub> ) <sub>4</sub> ZnCl <sub>3</sub>                                      | $Pmc2_1$     | [ZnCl <sub>4</sub> ] <sup>2-</sup> tetrahedra                                                           | 3.4           | NPM; 15×α-SiO <sub>2</sub> @1064 nm | 13        |
| [(CH <sub>3</sub> ) <sub>3</sub> NH] <sub>3</sub> Bi <sub>2</sub> I <sub>9</sub>        | $R3c$        | face-sharing [Bi <sub>2</sub> I <sub>9</sub> ] <sup>3-</sup> dimers                                     | 2.0           | 0.65×KDP                            | 14        |
| (BTA) <sub>3</sub> Bi <sub>2</sub> Cl <sub>9</sub>                                      | $Cc$         | 0D<br>face-sharing [Bi <sub>2</sub> Cl <sub>9</sub> ] <sup>3-</sup> dimers and BTA <sup>+</sup> cations | 3.21          | 1.36×KDP                            | This work |

D: dimensionality.

**Table S7.** The  $x/y/z$ -projections of local dipole moment (D) of  $[\text{BiCl}_6]^{3-}$  octahedrons and  $\text{BTA}^+$  groups in one-unit cell of  $(\text{BTA})_3\text{Bi}_2\text{Cl}_9$ .

| <b>Ion</b>             | $\mu_x$ | $\mu_y$ | $\mu_z$  |
|------------------------|---------|---------|----------|
| $\text{BTA}^+$         | 107.433 | 0       | -115.774 |
| $\text{BTA}^+$         | -46.898 | -0.006  | -289.918 |
| $\text{BTA}^+$         | 347.993 | -0.011  | 87.909   |
| $[\text{BiCl}_6]^{3-}$ | 34.592  | 0.012   | 0.321    |
| $[\text{BiCl}_6]^{3-}$ | -31.994 | 0.001   | -1.428   |

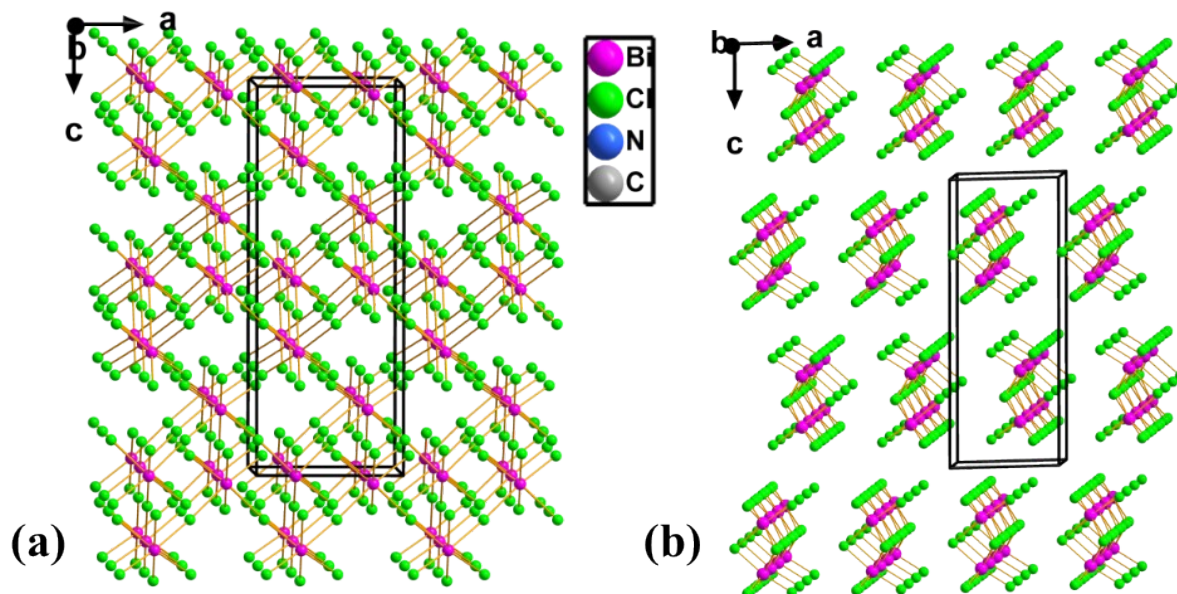

**Figure S1.** The crystal structures of  $(\text{CH}_3\text{NH}_3)_3\text{Bi}_2\text{Cl}_9$  (a, orthorhombic  $Pnma$ ) and  $(\text{CH}_3)_4\text{N})_3\text{Bi}_2\text{Cl}_9$  (b, hexagonal  $P6_3/mmc$ ). Noted the C, N and H atoms were omitted for clarity.

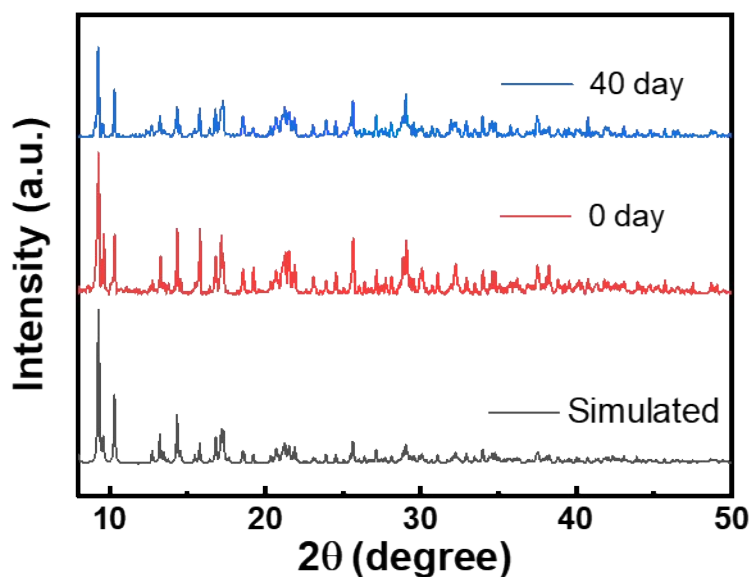

**Figure S2.** The powder X-ray diffraction patterns of  $(\text{BTA})_3\text{Bi}_2\text{Cl}_9$ , including simulated and experimental ones (Blue: after exposed in air for 40 days and dried at  $120^\circ\text{C}$ ).

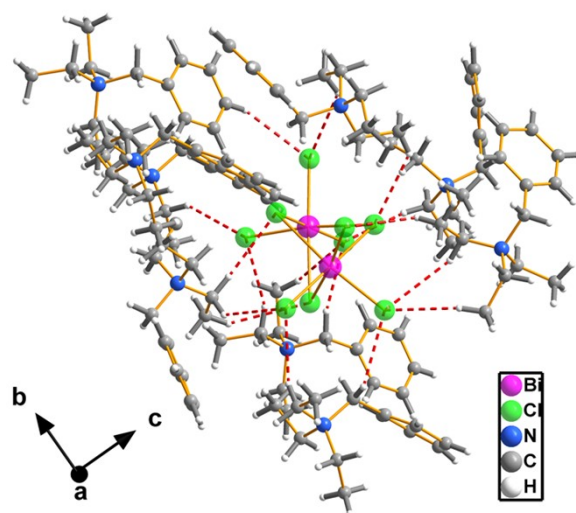

**Figure S3.** Structure showing the hydrogen bonds between the hydrogen atoms in  $\text{BTA}^+$  cations and the chlorine atoms in  $[\text{Bi}_2\text{Cl}_9]^{3-}$  in the  $bc$ -plane.

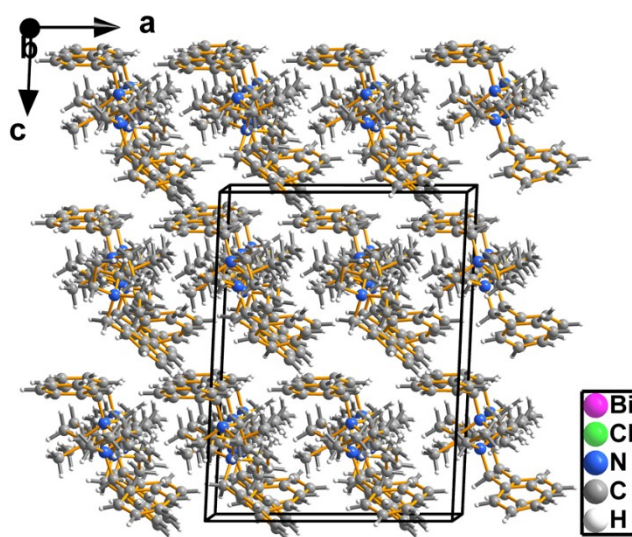

**Figure S4.** Uniformly arranged organic cations viewed along the  $b$ -axis.

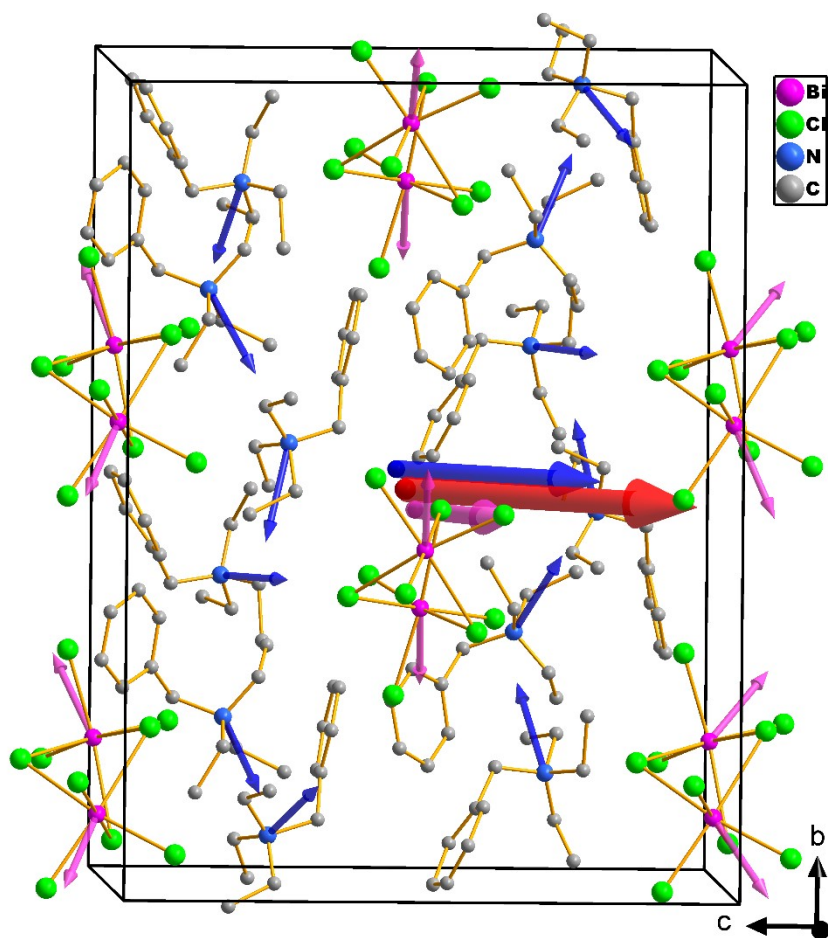

**Figure S5.** Dipole moments of  $[\text{Bi}_2\text{Cl}_9]^{3-}$  and  $\text{BTA}^+$  groups in one-unit cell. Blue:  $\text{BTA}^+$ ; purple:  $[\text{BiCl}_6]^{3-}$ . The blue, purple and red arrows in the middle present the total dipole moments of the organic parts, the inorganic parts and the whole unit cell, respectively.

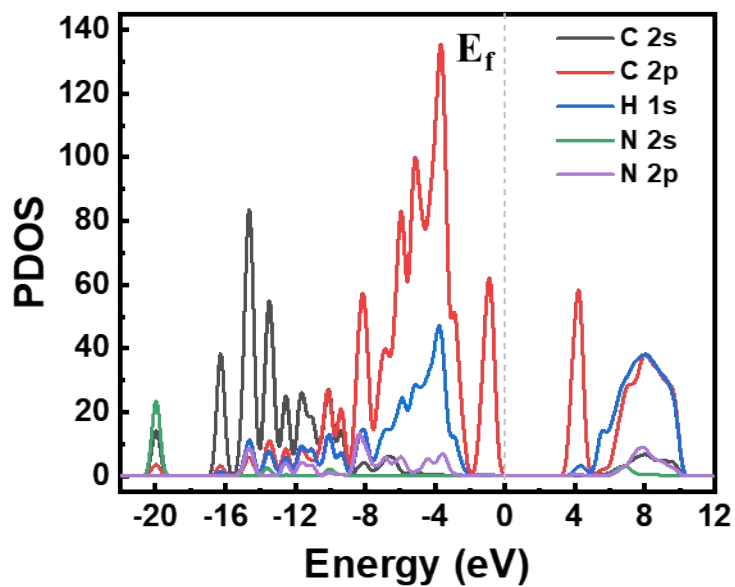

**Figure S6.** Partial density of states of C, N, and H atoms in  $(\text{BTA})_3\text{Bi}_2\text{Cl}_9$ .

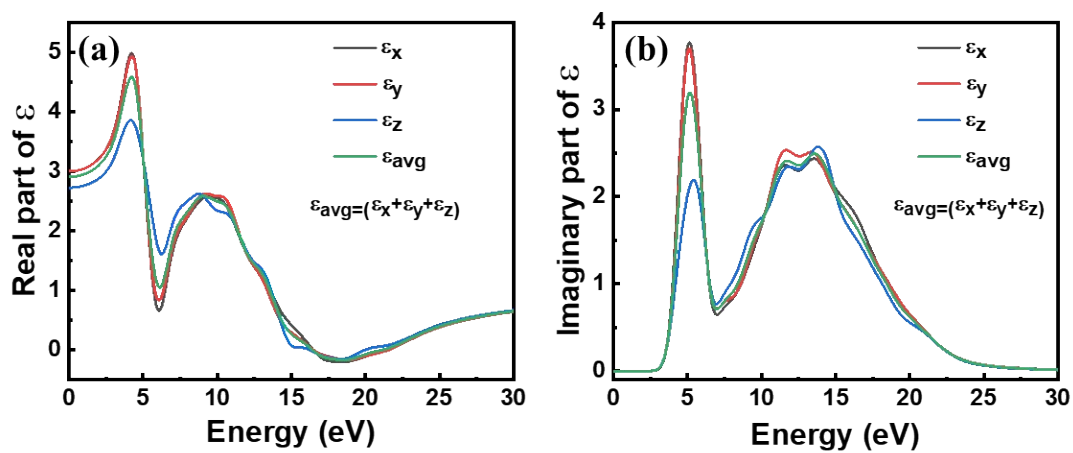

**Figure S7.** The calculated real and imaginary parts of the dielectric function polarized along the three directions for  $(\text{BTA})_3\text{Bi}_2\text{Cl}_9$ .

## References

- [1] D. Chen, S. Q. Hao, L. B. Fan, Y. W. Guo, J. Y. Yao, C. Wolverton, M. Kanatzidis, J. Zhao and Q. Liu, *Chem. Mater.*, 2021, **33**, 8106–8111.
- [2] Z. Y. Wu, X. T. Liu, C. M. Ji, L. N. Li, S. S. Wang, Z. H. Sun, W. C. Zhang, Y. Peng and J. H. Luo, *J. Mater. Chem. C*, 2018, **6**, 9532–9536.
- [3] L. L. Chu, T. Zhang, Y. F. Gao, W. Y. Zhang, P. P. Shi, Q. Ye and D. W. Fu, *Chem. Mater.*, 2020, **32**, 6968–6974.
- [4] X. Liu, W. L. Xu, S. R. Xu, X. Yu, Y. Q. Deng, X. Wu, F. Liang and Q. Wu, *Inorg. Chem.*, 2020, **59**, 5721–5727.
- [5] Y. Wang, T. Zhang, M. M. Lun, F. L. Zhou, D. W. Fu and Y. Zhang, *Inorg. Chem. Front.*, 2021, **8**, 4230 – 4238.
- [6] H. Y. Shen, L. He, P. P. Shi and Q. Ye, *J. Mater. Chem. C*, 2021, **9**, 4338–4343.
- [7] X. Liu, C. M. Ji, Z. Y. Wu, L. N. Li, S. G. Han, Y. Y. Wang, Z. H. Sun and J. H. Luo, *Chem. Eur. J.*, 2019, **25**, 2610 – 2615.
- [8] X. X. Zheng, Y. Liu, G. F. Liu, J. Liu, X. Ye, Q. X. Han, C. Ge and X. T. Tao, *Chem. Mater.*, 2016, **28**, 4421–4431.
- [9] L. L. Zhao, X. Han, Y. S. Zheng, M. H. Yu and J. L. Xu, *Adv. Photonics Res.*, 2021, **2**, 2100056.
- [10] T. H. Moon, S. J. Oh and K. Ok, *M. ACS Omega*, 2018, **3**, 17895–17903.
- [11] L. Yao, Z. X. S. Zeng, C. K. Cai, P. Xu, H. G. Gu, L. Gao, J. B. Han, X. W. Zhang, X. Wang, X. Wang, A. L. Pan, J. Wang, W. X. Liang, S. Y. Liu, C. Chen and J. Tang, *J. Am. Chem. Soc.*, 2021, **143**, 16095–16104.
- [12] Z. H. Guo, J. Z. Li, C. S. Wang, R. L. Liu, J. C. Liang, Y. Gao, J. J. Cheng, W. J. Zhang, X. Zhu, R. K. Pan and T. C. He, *Angew. Chem.*, 2021, **133**, 8522 –8526.
- [13] M. H. Choi, S. H. Kim, H. Y. Chang, P. S. Halasyamani and K. M. Ok, *Inorg. Chem.*, 2009, **48**, 8376 –8382.
- [14] J. Zhang, S. G. Han, C. M. Ji, W. C. Zhang, Y. Y. Wang, K. W. Tao, Z. H. Sun and J. H. Luo, *Chem. Eur. J.*, 2017, **23**, 17304–17310.
